# Supplementary material for: Respiratory syncytial virus infection of newborn CX3CR1-deficent mice induces a pathogenic pulmonary innate immune response
Source: JCI journal article supplement (doi:10.1172/jci.insight.94605), 2017-09-06
Supplement: sd1 [file 1]

## Supplemental Data

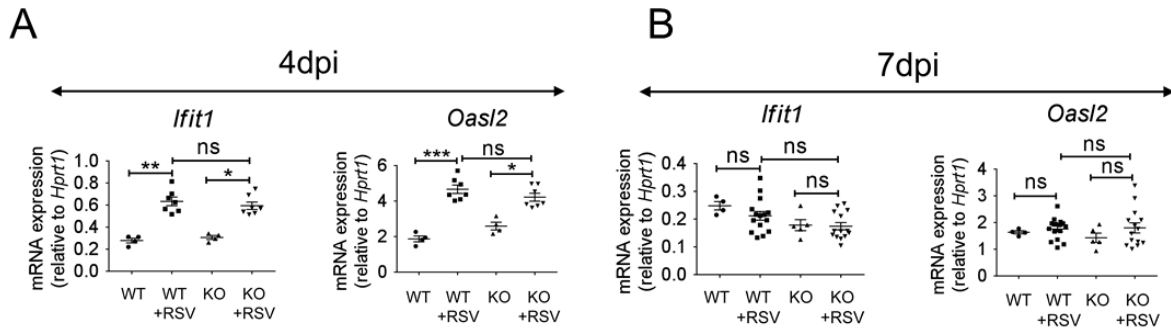

**Supplemental Figure 1. Lack of CX3CR1 does not affect ISG expression after RSV infection. (A-B)** mRNA expression of *Ifit1* and *Oas/2* in the lungs measured by quantitative RT-PCR on days (A) 4 and (B) 7 p.i. Data shown are mean  $\pm$  SEM combined from 2 independent experiments for days 4 and 7 p.i., n=2-3 (uninfected) and 3-9 (RSV-infected) WT or knockout (KO) mice per group per experiment. \* $P \leq 0.05$ , \*\* $P \leq 0.01$ , \*\*\* $P \leq 0.001$ , ns=non-significant. Kruskal-Wallis test (A and B) was used for statistical analysis.

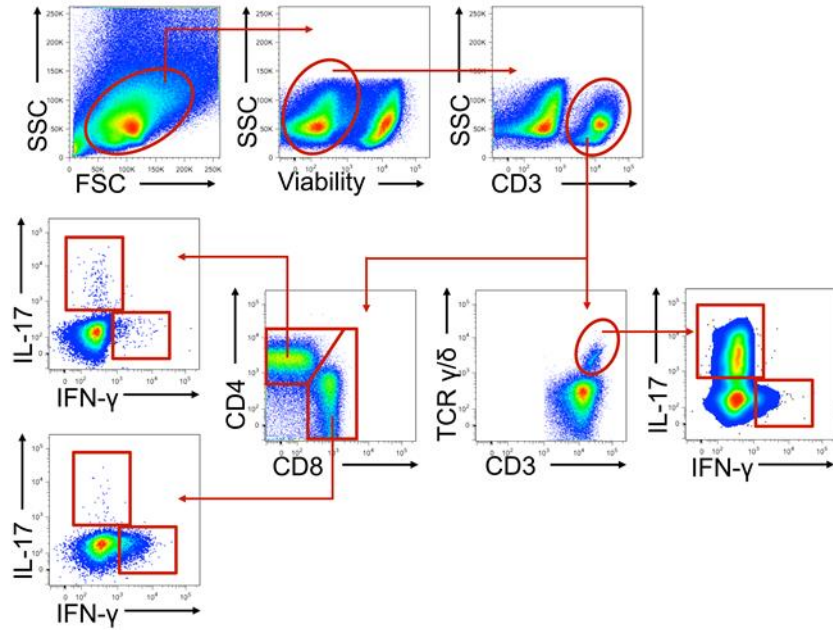

**Supplemental Figure 2. Flow cytometry-based identification of IL-17+ and IFN $\gamma$ +  $\gamma\delta$  T cells, and CD4+ and CD8+ T cells.** Gating strategy was the same whether cells were derived from WT or *CX3CR1*<sup>-/-</sup> mice. Lymphoid cells were gated based on forward and side scatter. Live cells were gated based on the negative population for viability dye. CD3+ gates were used on live cells and subsequently gates for TCR  $\gamma\delta$ +, CD4+ and CD8+ populations were applied. Gates for IL-17 and IFN- $\gamma$  expression were further applied to different T cell subsets. The gating strategy shown represents data from RSV-infected *CX3CR1*<sup>-/-</sup> mice on day 7 p.i.

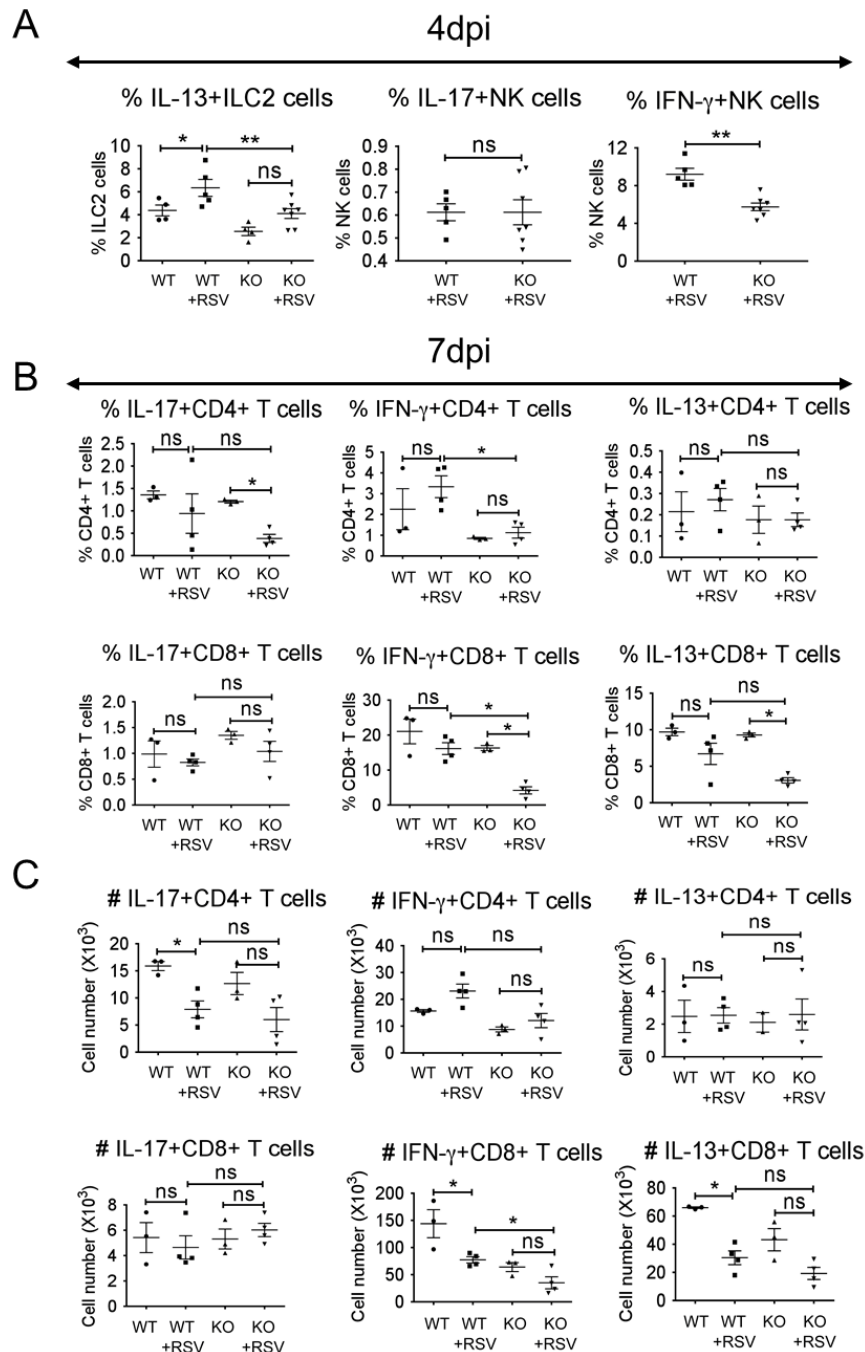

**Supplemental Figure 3. CX3CR1-deficiency does not affect cytokine production from ILC2 cells, NK cells, CD4+ T cells or CD8+ T cells in lungs after RSV infection. (A-C)** Flow cytometric analysis of the mentioned groups showing **(A)** frequencies of IL-13+ILC2 cells, IL-17+NK cells, and IFN- $\gamma$ +NK cells on day 4 p.i., Data shown are mean  $\pm$  SEM, representative of 2 independent experiments, n=4 (uninfected) and 5-7 (RSV-infected) WT or knockout (KO) mice per group per experiment. **(B)** frequencies of IL-17+ $\gamma\delta$  T cells, IFN- $\gamma$ + $\gamma\delta$  T cells, and IL-13+CD4+ and CD8+ T cells on day 7 p.i., and **(C)** total number of IL-17+, IFN- $\gamma$ + and IL-13+ CD4+ and CD8+ T cells, on day 7 p.i. Data shown are mean  $\pm$  SEM, representative of 2 independent experiments, n=3 (uninfected) and 4 (RSV-infected) WT or KO mice per group per experiment. Analyses were performed using FlowJo software. \*P  $\leq$  0.05, \*\*P  $\leq$  0.01, ns=non-significant. Kruskal-Wallis **(A-C)** or Mann-Whitney U test **(A)** was used for statistical analysis.

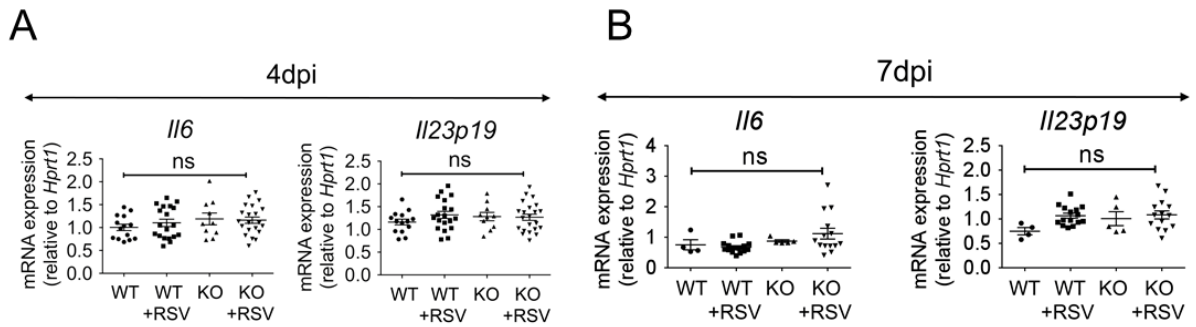

**Supplemental Figure 4. Lack of CX3CR1 does not affect mRNA expression for the *Il6* and *Il23p19* genes. (A-B) *Il6* and *Il23p19* mRNA expression in the lungs measured by quantitative RT-PCR on days (A) 4 and (B) 7 p.i. Data shown are mean  $\pm$  SEM combined from 3 and 2 independent experiments for days 4 and 7 p.i. respectively. n=2-6 (uninfected) and 6-9 (RSV-infected) WT or knockout (KO) mice per group per experiment. ns=non-significant. Kruskal-Wallis test (A and B) was used for statistical analysis.**
